# 1 **An optimized strategy for cloning-based locus-specific bisulfite sequencing PCR**

2

3 Mario Van Poucke<sup>1,\*</sup>, Xanthippe Boulougouris<sup>1</sup>, Bart De Spiegeleer<sup>2</sup>, Christian Burvenich<sup>1</sup>, Luc  
4 Duchateau<sup>1</sup> and Luc J. Peelman<sup>1</sup>

5

6 <sup>1</sup> Department of Nutrition, Genetics and Ethology, Faculty of Veterinary Medicine, Ghent  
7 University, Heidestraat 19, B-9820 Merelbeke, Belgium

8 <sup>2</sup> Drug Quality and Registration (DruQuaR) group, Faculty of Pharmaceutical Sciences, Ghent  
9 University, Ottergemsesteenweg 460, B-9000 Ghent, Belgium

10

11 \* Correspondence: Dr Mario Van Poucke, Department of Nutrition, Genetics and Ethology, Faculty  
12 of Veterinary Medicine, Ghent University, Heidestraat 19, B-9820 Merelbeke, Belgium; Tel +32 9  
13 2647806; Fax +32 9 2647849; E-mail: Mario.VanPoucke@UGent.be

14

15 Keywords: bias, bisulfite conversion, clone, CpG island, epigenetic, method, methylation, UBC  
16 integrity assay

17 **ABSTRACT**

18 In this methods paper, we describe a successful strategy to investigate locus-specific methylation by  
19 cloning-based bisulfite sequencing. We cover sample handling, DNA isolation, DNA quality control  
20 before bisulfite conversion, bisulfite conversion, DNA quality control after bisulfite conversion, *in*  
21 *silico* identification of CpG islands, methylation-independent bisulfite sequencing PCR (BSP) assay  
22 design, methylation-independent BSP, cloning strategy, sequencing and data analysis. Methods that  
23 are described nicely elsewhere will not be covered in detail. Instead, the focus will be on tips/tricks  
24 and new methods/strategies used in this protocol, including quality control assessment of the DNA  
25 before and after bisulfite conversion and a pooled cloning strategy to reduce time, costs and effort  
26 during this step. In addition we comment on dealing with bias and improving overall protocol  
27 efficiency.

## 28 INTRODUCTION

29 There are a lot of ways to study DNA methylation. Depending on the scientific question, the  
30 samples (type, quality, quantity, number), the laboratory equipment and funds, researchers can  
31 compose their most appropriate strategy. Since all methods have their pros and cons, it is vital to  
32 evaluate all steps for potential bias, take measures to prevent them and include necessary controls to  
33 monitor them [1-2].

34 Here, we report our strategy for cloning-based locus-specific bisulfite sequencing PCR (BSP) to  
35 investigate the methylation status of specific CpG islands at single base resolution. The strategy is  
36 partially based on described strategies [3-11], but also contains some useful adaptations. This  
37 strategy can be used to investigate if a gene specific expression change in an organism is caused by  
38 an altered methylation status of that gene.

39 First, bisulfite treatment, the gold standard method in DNA methylation studies, will selectively  
40 convert “unmethylated” cytosine (C) to uracil (U), while “methylated” C will not be converted [12].  
41 It should be noted that other C-modifications, such as 5-formylcytosine (5-fC) and 5-  
42 carboxylcytosine (5-caC), will be converted to U as well, while others, such as 5-  
43 hydroxymethylcytosine (5-hmC), will not be converted either. However, adapted methods exist to  
44 study these rarer modifications separately [13-14].

45 Then, PCR is performed to selectively amplify the bisulfite-converted region of interest, whereby U  
46 (native C, 5-fC and 5-caC) will be replaced by thymine (T) and non-converted C (native 5-mC and  
47 5-hmC) by C. After Sanger sequencing, all remaining Cs can be considered as “methylated” Cs in  
48 the native sequence (5-mC or 5-hmC). We prefer a cloning-based strategy (instead of direct  
49 sequencing) in order to obtain DNA methylation haplotypes. In addition, the interpretation of the  
50 peaks is unequivocally (no mixed bases, misaligned signals or PCR slippage). In order to make it

51 less laborious, we maximize amplicon lengths based on the bisulfite-converted DNA quality control  
52 and use a pooled cloning strategy.

53

## 54 **PROTOCOL**

### 55 **1) Sample handling**

56 Because bisulfite sequencing is most successful with intact starting material, tissue/DNA samples  
57 should be handled/stored in a way that prevents DNA degradation. Well known key factors are  
58 temperature (cold, avoiding freeze-thaw cycles), humidity (dry), sunlight (darkness) and time  
59 (quick). For extensive guidelines see [15].

### 60 **2) DNA isolation**

61 Total DNA is isolated with the Quick-DNA Miniprep Plus Kit (including a Proteinase K digest,  
62 according to the Zymo Research's recommendations), described to extract ultra-pure concentrated  
63 RNA-free high-quality DNA from a wide range of biological sample types ready for bisulfite  
64 sequencing (maximal binding capacity of the column is 25 µg DNA and minimal elution volume is  
65 35 µl). Many other kits or protocols are described that should work equally good [16]. At first use  
66 we recommend to isolate DNA from a test sample and evaluate the procedure(s) based on the DNA  
67 quality control results (see Protocol, section 3).

### 68 **3) DNA quality control before bisulfite conversion**

69 The quantity and purity of the extracted DNA is measured with Nanodrop as dsDNA (Isogen).  
70 Integrity is evaluated by analysing 1 µg of DNA on a 1% agarose gel and by performing the UBC  
71 integrity assay on 5 ng DNA (Table 1 and Figure 1.A). The UBC integrity assay consists of a single  
72 monoplex PCR reaction amplifying fragments of different lengths (137, 365, 593, 821,... bp)  
73 analysed on a 2% agarose gel [17]. Pure and intact DNA will allow amplification of all fragments,  
74 while higher degrees of impurity and/or degradation will result in a decrease of amplification

75 products starting with the longer amplicons. Implementation of the multi-use UBC integrity assay in  
76 the lab is of particular interest since this single assay can not only be used for quality assessment of  
77 DNA from different mammals (checking presence, integrity, amplificability), but also to estimate  
78 the DNA contamination level in RNA samples and to perform quality assessment of cDNA reverse  
79 transcribed from RNA isolated from any tissue (reflecting the RNA quality). Ideally, DNA should  
80 be pure and integer (= OD260/280 around 1.8 on Nanodrop, a high molecular weight band on gel  
81 and generation of all amplicons with the UBC integrity assay). Also for this step other methods (e.g.  
82 fluorometric- or microfluidic-based methods) can be used to perform DNA quality control [18].

#### 83 **4) Bisulfite conversion**

84 Bisulfite conversion is performed on 500 ng of RNA-free high-quality DNA with the EZ DNA  
85 Methylation-Lightning Kit (according to the Zymo Research's recommendations), described to  
86 convert > 99.5% of unmethylated Cs and to protect > 99.5% of methylated Cs, with a DNA  
87 recovery of > 80%. Higher input levels of DNA are not recommended because they might result in  
88 incomplete bisulfite conversion. Recommended input levels can go as low as 100 pg, however this  
89 will lower proportionally the number of downstream PCR reactions and the maximal fragment  
90 length that can be amplified (because of the lower input of damaged DNA, the number of the longer  
91 fragments might drop below the threshold for amplification). The bisulfite-converted DNA is eluted  
92 in 10  $\mu$ l (around 40 ng/ $\mu$ l bisulfite-converted DNA). Many other kits or protocols are described that  
93 can be used [10,16]. At first use we recommend to perform bisulfite conversion on a test sample and  
94 evaluate the procedure(s) based on the DNA quality control results after bisulfite conversion (see  
95 Protocol, section 5).

#### 96 **5) DNA quality control after bisulfite conversion**

97 The quantity and purity of the DNA after bisulfite conversion, known to damage DNA, is measured  
98 with Nanodrop as ssRNA (Isogen). Integrity and amplificability is evaluated by performing the

99 UBC bisulfite integrity assay on 5 ng of bisulfite-converted DNA (Table 1 and Figure 1.B). It is a  
100 similar assay as the one used for native DNA, but for DNA after bisulfite conversion [17].  
101 Comparing the results of both integrity assays will give an idea about the impact of bisulfite  
102 conversion on the DNA integrity of the sample. It will also give an idea about the maximal fragment  
103 length that can be PCR amplified from the sample. Because of the fragility of bisulfite-converted  
104 DNA, it is advised to proceed immediately to PCR and freeze the rest in aliquots.

#### 105 **6) *In silico* identification of CpG islands**

106 *In silico* identification of CpG islands in target genes is based on common hits in different genome  
107 browsers (Ensembl, UCSC and NCBI) and online tools such as CpG Islands (The Sequence  
108 Manipulation Suite), DBCAT, CpGplot (EMBOSS) and MethPrimer [19-25].

#### 109 **7) Methylation-independent BSP assay design**

110 Methylation-independent BSP primer design and electronic PCR, detecting potential mispriming  
111 sites and undesired PCR products, is performed by BiSearch [26]. To our knowledge, it is the only  
112 free software combining BSP primer design and electronic PCR. Customized parameters are  
113 discussed below.

114 Because bisulfite-converted DNA is not complementary anymore, a choice has to be made whether  
115 to design primers amplifying the sense or the antisense strand. We suggest to try both strands and  
116 choose the most optimal primers. Because of the symmetry of the CpG motifs and the mode of  
117 action of the methyltransferases, the methylation status of every CpG motif should be identical to its  
118 complement, unless the region of interest is prone to hemimethylation [27]. Signs for  
119 hemimethylation can be observed by analysing the methylation status of CpGs in overlapping parts  
120 of amplicons targeting the different strands and warrant further investigation.

121 Amplicon length is based on the length of the CpG island to be analysed (see Protocol, section 6),  
122 the integrity and amplificability of the bisulfite-converted DNA (see Protocol, section 5) and the

123 cloning strategy (see Protocol, section 9). Using the described protocol, amplicons up to 800 bp can  
124 be amplified starting from high-quality DNA.

125 Because of the bisulfite conversion, 4-base DNA (25% of A, G, C and T) will be shifted towards 3-  
126 base DNA (towards 25% A, 25% G, 0% C and 50 % T), reducing DNA complexity. In order to have  
127 the same specificity, bisulfite primers might need to be longer compared to native primers.

128 In case an estimate of the primer occurrence in a particular template is wanted, the following  
129 formula can be used:  $N \times (pA^{Na}) \times (pG^{Ng}) \times (pC^{Nc}) \times (pT^{Nt})$ , with N being the number of  
130 nucleotides in the template, pA/pG/pC/pT the estimated frequencies of the respective nucleotides in  
131 that template (sum should be 1) and Na/Ng/Nc/Nt the number of the respective nucleotides in the  
132 primer. In an average mammalian genome of  $3 \times 10^9$  bp (assuming that every nucleotide appears at  
133 25%), a native primer of 20 bp (containing 5 times each nucleotide) would theoretically occur  
134 0,0027 times ( $= (3 \times 10^9) \times (0.25^5) \times (0.25^5) \times (0.25^5) \times (0.25^5)$ ), so considered to be highly  
135 specific. For bisulfite primers in a hypothetical 100% methylated genome (0% C converted to T), it  
136 would be the same. In a hypothetical 100% unmethylated genome (100% C converted to T) a  
137 similar 20-bp primer (all 5 Cs converted to Ts) would occur 3 times ( $= (3 \times 10^9) \times (0.25^5) \times$   
138  $(0.25^5) \times (0^0) \times (0.5^{10})$ ), so considered to be not specific. In a genome where 40% of the Cs  
139 would be methylated, a similar 20-bp primer (3 out of 5 Cs would be converted to T) would occur  
140 0.02 times ( $= (3 \times 10^9) \times (0.25^5) \times (0.25^5) \times (0.1^2) \times (0.4^8)$ ), about 10 times less specific than  
141 the respective native primer.

142 Taking into account the completeness of genome databases, the specificity of potential PCR primers  
143 can be checked via the fast PCR tool of BiSearch using the 16-mer mismatch string parameter to  
144 specify nucleotide specific differences (e.g. random mismatch in the genome and Cs that might or  
145 might not be converted after bisulfite treatment). In addition, the native versions of the bisulfite  
146 primers can be checked for known SNPs via NCBI-BLAST in order to prevent null-alleles [28].

147 To avoid that primer annealing is affected by the methylation status of the primer target sequence,  
148 primers should not contain CpGs. In case they do, degenerate primers should be designed with a Y  
149 (C or T) instead of a C. Amplifying unconverted DNA can be prevented by including some non-  
150 CpG Cs in the native primer sequence (they will be replaced by Ts in the bisulfite primer and as a  
151 result only be specific for converted DNA). To make sure, it can be experimentally verified that  
152 methylation-independent primers do not amplify unconverted DNA.

153 Annealing temperatures should be as high as possible to prevent potential secondary structures in  
154 the template and avoiding primer dimer formation. Inter-primer melting temperature ( $T_m$ )  
155 differences should be as low as possible (lower than  $1^\circ\text{C}$ ) to prevent non-binding of the primer with  
156 the lower  $T_m$  or non-specific binding of the primer with the higher  $T_m$ .

#### 157 **8) Methylation-independent BSP**

158 Because PCR on bisulfite-converted DNA is prone to non-specific amplification due to its high AT  
159 content, it is strongly recommended to use a HotStart polymerase. From the wide range of available  
160 DNA polymerases, we use TEMPase HotStart Polymerase (according to VWR's recommendations),  
161 designed to diminish the formation of non-specific priming events during reaction set-up and the  
162 first ramp of thermal cycling. It is a non-proofreading DNA polymerase (produces 3'-A overhangs),  
163 allowing TA cloning (see Protocol, section 9). Other DNA polymerases can be used, but not all.  
164 Archaeal polymerases, such as the high-fidelity polymerases Vent and Pfu, are unable to efficiently  
165 copy bisulfite-converted DNA due to the stalling triggered by template uracil [29]. In addition,  
166 unmodified high-fidelity polymerases will complicate subsequent TA-cloning, because they do not  
167 produce 3'-A overhangs.

168 PCR is performed for 40 cycles ( $30''$ - $95^\circ\text{C}$ ,  $30''$ - $T_a$ ,  $2'$ - $72^\circ\text{C}$ ) with 5 ng bisulfite-converted DNA as  
169 a template (= on average 80 reactions can be performed per conversion) on a S1000 Thermal Cycler  
170 (Bio-Rad) with gradient function. During optimization of the assays, a 5-point gradient PCR is



171 performed with as annealing temperature ( $T_a$ ) the predicted  $T_m$   $-4^\circ\text{C}$ ,  $-2^\circ\text{C}$ ,  $+0^\circ\text{C}$ ,  $+2^\circ\text{C}$  and  $+4^\circ\text{C}$ .  
172 Amplicons are analysed on a 2% agarose gel. The averaged  $T_a$  of all  $T_a$  with specific amplification  
173 is chosen as assay  $T_a$ . Because of the complexity of the PCR reaction (fragmented DNA, low  
174 complexity target, presence of U) it might be needed to increase extension times.

## 175 **9) Cloning strategy**

176 If multiple fragments need to be analysed, we opt for a pooled cloning strategy in pCRII (TA-  
177 cloning kit, Invitrogen) in order to reduce time, costs and effort during this step. Ideally, pooled  
178 amplicons should differ in length (the longer the amplicons, the longer the difference). After PCR  
179 on bisulfite-converted DNA with a non-proofreading DNA polymerase, the different amplicons are  
180 analysed on a 2% agarose gel, cut out with a scalpel and eluted together (up to 4 different  
181 amplicons) with the GENECLAN II kit (MP Biomedicals) in 8  $\mu\text{l}$ . One  $\mu\text{l}$  of the eluted amplicon  
182 mix is analysed on a 2% agarose gel to validate the amplicon quantities (Figure 1.C). Six  $\mu\text{l}$  of the  
183 eluted amplicon mix is then ligated in 1  $\mu\text{l}$  pCRII with 1  $\mu\text{l}$  T4 DNA ligase (= 1 U) and 2  $\mu\text{l}$  5x T4  
184 DNA ligase buffer at  $14^\circ\text{C}$  overnight. Two  $\mu\text{l}$  of the ligation mix is then transformed into 50  $\mu\text{l}$   
185 Subcloning Efficiency DH5 $\alpha$  Competent Cells and grown overnight on LB plates containing 100  
186  $\mu\text{g}/\text{ml}$  ampicillin and 50  $\mu\text{g}/\text{ml}$  X-gal (allowing blue/white screening; according to Invitrogen's  
187 instructions). The next day, individual white colonies (containing 1 insert) are striped on new plates  
188 and grown overnight. The next day, a tip-point of cells is resuspended in 100  $\mu\text{l}$  water and 2  $\mu\text{l}$  is  
189 used for colony PCR. If the amplicon length difference of the pooled fragments can be  
190 distinguished on a 2% agarose gel, pCRII primers bordering the TA cloning site can be used to  
191 amplify the insert to be sequenced (Table 1). Two  $\mu\text{l}$  of the PCR product can be analysed on a 2%  
192 agarose gel to check the amount and the identity of the insert based on fragment length (Figure  
193 1.D). By doing so, the amount of input for sequencing and the number of clones to be sequenced  
194 from each pooled fragment can be controlled. If some of the pooled fragments can not be

195 distinguished from each other by length, they can be first cut with a specific restriction enzyme  
196 before gel analysis, or fragment specific primers can be used on the undetermined clones. If  
197 preferring another cloning strategy, the above-mentioned issues can be adopted as needed.

## 198 **10) Sequencing**

199 The rest of the colony PCR product (= 8 µl) of the selected clones (at least 6 for every fragment) is  
200 cleaned-up for Sanger sequencing by adding 4 U exonuclease I (Bioké) and 2 U antarctic  
201 phosphatase (Bioké), and incubating for 30 min at 37°C (enzymatic reaction) and 15 min at 80°C  
202 (enzyme inactivation). Two µl of the treated PCR product is usually (depending on its amount based  
203 on Figure 1.D) used for the sequencing reaction with the BigDye Terminator v3.1 Cycle Sequencing  
204 Kit (Applied Biosystems; Table 2) using one or both (depending on the length of the insert) PCR  
205 primers as individual sequencing primer.

## 206 **11) Data analysis**

207 The chromatograms are inspected manually for errors and the sequences are trimmed (insert  
208 without amplicon specific primer sequences, because they do not represent the methylation status of  
209 the native fragment) with BioEdit (free software) [30]. Extracting the methylation data (including  
210 quality control and visualisation in lollipop-style) is performed with BiQ Analyzer (free software)  
211 [31].

212

## 213 **COMMENTARY**

### 214 **1) Dealing with bias**

215 It is important to evaluate every step of the protocol for a potential introduction of bias. Most  
216 critical is probably the conversion efficiency of the bisulfite treatment. According to the  
217 specifications of the kit used in our protocol the conversion efficiency is > 99.5% (= less than 1  
218 error per 200 CpGs). For a hypothetical amplicon of 400 bp containing 40 CpGs, this would mean

219 less than 1 CpG error per 5 amplicons. Experimental bisulfite conversion efficiencies can be  
220 estimated by calculating the percentage of non-CpG Cs in the native amplicon sequence that are  
221 really converted to Ts in the bisulfite-converted sequence (one of the QC parameters of BiQ  
222 Analyzer). Including non-CpG Cs in the native primer sequence will prevent amplification of  
223 unconverted DNA and thus lower potential bias.

224 Another source of potential bias is caused by PCR. According to the PCR Fidelity Calculator  
225 (ThermoFischer Scientific) [32], amplification of the hypothetical 400-bp fragment for 40 cycles  
226 with *Taq* DNA polymerase would introduce 1 error in 1/3 of the amplicons. Because only C>T  
227 errors at methylated CpGs or T>C errors at unmethylated CpGs (= 1/3 of all possible errors) of the  
228 40 CpGs of the amplicon (= 1/10 of the sequence) would create bias (all other errors would be  
229 noticed as errors), this would theoretically result in a wrong determination of the methylation status  
230 of only 1 CpG per 90 amplicons (=  $1/3 * 1/3 * 1/10$ ; almost 20-fold less than bisulfite conversion  
231 errors). Because we perform cloning-based sequencing involving colony PCR with a non-high-  
232 fidelity DNA polymerase, a similar PCR bias is created during this step. However, there would be  
233 no implications here when using a high-fidelity DNA polymerase to lower this bias. In addition, it  
234 might even lower potential PCR slippage (another PCR bias), typically due to sequential Ts ( $N > 9$ ).  
235 In case PCR slippage during colony PCR hinders sequencing (not an issue before cloning),  
236 sequencing could be performed on DNA extracted from a single clone (instead of performing  
237 colony PCR).

238 To test if the primers amplify methylation independent (and not in favour of unmethylated  
239 templates), PCR on a 50:50 methylated/unmethylated bisulfite converted control sample is  
240 frequently performed. To make sure that all tested amplicons are really 50:50  
241 methylated/unmethylated, all regions under investigation are first PCR amplified with native  
242 primers on native DNA as a template (these amplicons can contain multiple overlapping BSP

243 amplicons). These 100% unmethylated amplicons are mixed and split into two parts. One part will  
244 serve as the unmethylated part, the second part will be 100% CpG methylated by a CpG  
245 methyltransferase treatment (M.SssI, Bioké). This can be verified by cutting an aliquot of both parts  
246 with *HpaII* (Bioké). It will cut unmethylated CCGG (= unmethylated part 1), but not methylated  
247 CCGG (= methylated part 2). Both parts are then mixed, cleaned-up (QIAquick DNA purification  
248 kit, Qiagen) and bisulfite converted. Then all BSP assays are performed and amplicons digested  
249 with *HpaII* and *TaqI*. *HpaII* (cuts CCGG) will not cut bisulfite converted DNA (unmethylated  
250 CCGG will be converted to TTGG and methylated CCGG will be converted to TCGG). So, if none  
251 of the amplicons are digested it means that the bisulfite conversion was successful. *TaqI* (cuts  
252 TCGA) will not cut the unmethylated part (all native TCGA sequences are converted to TTGA), but  
253 will cut the methylated part (all native TCGA will not be converted and all CCGA will be converted  
254 to TCGA). So, if half of the amplicons are digested it means that the assays amplify methylation  
255 independent.

256 In order to have a reliable estimate of the methylation status and to minimize the effect of a  
257 potential error at every single CpG, six clones are sequenced. To obtain a more precise  
258 determination of the methylation status of partially methylated loci, additional clones containing  
259 those loci can be sequenced or methylation specific primers targeting those loci can be used as  
260 deemed fit. In case of doubt about cloning bias, direct sequencing can be performed and the results  
261 compared with the ones obtained via cloning-based sequencing.

262 Results from identical sequences from overlapping amplicons can also be used to evaluate the  
263 reliability of the results. In addition, chromatograms are inspected manually in order to avoid base  
264 calling errors during sequencing.

265 Finally, it is obvious that positive and negative controls should be performed and contamination  
266 should be avoided at any time.

## 267 **2) Improving overall protocol efficiency**

268 It is important to avoid DNA degradation because bisulfite sequencing is most successful with intact  
269 starting material. In addition, it will allow you to amplify longer amplicons (determined by the UBC  
270 bisulfite integrity assay), resulting in less amplicons to process. In order to maximize the chance to  
271 reach the threshold number of fragments for amplification of these longer fragments, the maximal  
272 advised DNA input for bisulfite conversion is used.

273 The protocol involves 2 PCR steps, one PCR on bisulfite-converted DNA before cloning and one  
274 colony PCR. Because the theoretical bias created by the DNA polymerase is about 20-fold lower  
275 than the bias created during bisulfite conversion, there is no big benefit to use more expensive high-  
276 fidelity DNA polymerases, that even might complicate TA cloning. In our opinion, if primer design  
277 guidelines are followed properly, there is no need for optimization (except for determining the  
278 optimal experimental Ta) or performing (semi)-nested PCR.

279 Because cloning-based bisulfite sequencing is labour intensive, the pooled cloning strategy really  
280 makes it more efficient. If pooled amplicons differ at least 50 bp in length, their clones can easily be  
281 distinguished from each other by a single colony PCR with universal vector primers. If not,  
282 additional work might be needed to identify the clones in order not to sequence too many clones  
283 containing the same amplicon. Although we were able to amplify amplicons of 800 bp, it is always  
284 easier to amplify, clone and sequence smaller amplicons. In the pooled cloning strategy we used no  
285 more than 4 amplicons between 350 and 500 bp.

286 At last, using free data analysis software, such as BiQ Analyser, minimizes errors and speeds up the  
287 analysis.

## 288 ACKNOWLEDGEMENTS

289 We wish to thank Carolien Rogiers, Dominique Vander Donckt, Linda Impe and Ruben Van  
290 Gansbeke for excellent technical assistance.

291

## 292 CONFLICT OF INTEREST

293 The authors declare no conflict of interest

294

## 295 REFERENCES

296 [1] Kurdyukov S, Bullock M: DNA Methylation Analysis: Choosing the Right Method. *Biology*  
297 2016; 5:3. doi: 10.3390/biology5010003.

298 [2] Olkhov-Mitsel E, Bapat B: Strategies for discovery and validation of methylated and  
299 hydroxymethylated DNA biomarkers. *Cancer Med* 2012; 1:237-60. doi: 10.1002/cam4.22.

300 [3] Clark SJ, Harrison J, Paul CL, Frommer M: High sensitivity mapping of methylated cytosines.  
301 *Nucleic Acids Res* 1994; 22:2990-7.

302 [4] Warnecke PM, Stirzaker C, Song J, Grunau C, Melki JR, Clark SJ: Identification and resolution  
303 of artifacts in bisulfite sequencing. *Methods* 2002; 27:101-7.

304 [5] Wojdacz TK, Hansen LL, Dobrovic A: A new approach to primer design for the control of PCR  
305 bias in methylation studies. *BMC Res Notes* 2008; 1:54. doi: 10.1186/1756-0500-1-54.

306 [6] Zhang Y, Rohde C, Tierling S, *et al*: DNA methylation analysis by bisulfite conversion, cloning,  
307 and sequencing of individual clones. *Methods Mol Biol* 2009; 507:177-87. doi: 10.1007/978-1-  
308 59745-522-0\_14.

309 [7] Darst RP, Pardo CE, Ai L, Brown KD, Kladde MP: Bisulfite sequencing of DNA. *Curr Protoc*  
310 *Mol Biol* 2010; **Chapter 7**:Unit 7.9.1-17. doi: 10.1002/0471142727.mb0709s91.

- 311 [8] Li Y, Tollefsbol TO: DNA methylation detection: bisulfite genomic sequencing analysis.  
312 *Methods Mol Biol* 2011; **791**:11-21. doi: 10.1007/978-1-61779-316-5\_2.
- 313 [9] Patterson K, Molloy L, Qu W, Clark S: DNA methylation: bisulphite modification and analysis.  
314 *J Vis Exp* 2011; **56**:e3170. doi: 10.3791/3170.
- 315 [10] Hernández HG, Tse MY, Pang SC, Arboleda H, Forero DA: Optimizing methodologies for  
316 PCR-based DNA methylation analysis. *Biotechniques* 2013; **55**:181-97. doi: 10.2144/000114087.
- 317 [11] Methylation Analysis by Bisulfite Sequencing: Chemistry, Products and Protocols from  
318 Applied Biosystems. URL: [https://tools.thermofisher.com/content/sfs/manuals/cms\\_039258.pdf](https://tools.thermofisher.com/content/sfs/manuals/cms_039258.pdf).  
319 [accessed 05-12-2017].
- 320 [12] Frommer M, McDonald LE, Millar DS, *et al*: A genomic sequencing protocol that yields a  
321 positive display of 5-methylcytosine residues in individual DNA strands. *Proc Natl Acad Sci U S A*  
322 1992; **89**:1827-31.
- 323 [13] Neri F, Incarnato D, Krepelova A, Parlato C, Oliviero S: Methylation-assisted bisulfite  
324 sequencing to simultaneously map 5fC and 5caC on a genome-wide scale for DNA demethylation  
325 analysis. *Nat Protoc* 2016; **11**:1191-205. doi: 10.1038/nprot.2016.063.
- 326 [14] Booth MJ, Branco MR, Ficiz G, *et al*: Quantitative sequencing of 5-methylcytosine and 5-  
327 hydroxymethylcytosine at single-base resolution. *Science* 2012; **336**:934-7. doi:  
328 10.1126/science.1220671.
- 329 [15] Doorenweerd C, Beentjes K: Extensive guidelines for preserving specimen or tissue for later  
330 DNA work. URL: <https://science.naturalis.nl/media/medialibrary/2013/08/preservingdna.pdf>  
331 [accessed 17-08-2017].
- 332 [16] Holmes EE, Jung M, Meller S, *et al*: Performance evaluation of kits for bisulfite-conversion of  
333 DNA from tissues, cell lines, FFPE tissues, aspirates, lavages, effusions, plasma, serum, and urine.  
334 *PLoS One* 2014; **9**:e93933. doi: 10.1371/journal.pone.0093933.

- 335 [17] Van Poucke M, Peelman L: Flexible, multi-use, PCR-based nucleic acid integrity assays based  
336 on the ubiquitin C gene. *bioRxiv* 2017; doi.org/10.1101/168195.
- 337 [18] Zonta E, Nizard P, Taly V: Assessment of DNA Integrity, Applications for Cancer Research.  
338 *Adv Clin Chem* 2015; **70**:197-246. doi: 10.1016/bs.acc.2015.03.002.
- 339 [19] Yates A, Akanni W, Ridwan Amode M, *et al*: Ensembl 2016. *Nucleic Acids Res* 2016;  
340 **44**:D710-6. doi:10.1093/nar/gkv1157.
- 341 [20] Kent WJ, Sugnet CW, Furey TS, *et al*: The human genome browser at UCSC. *Genome Res*  
342 2002; **12**:996-1006.
- 343 [21] National Center for Biotechnology Information (NCBI)[Internet]. Bethesda (MD): National  
344 Library of Medicine (US), National Center for Biotechnology Information; [1988] – [cited 2017  
345 Aug 17]. Available from: <https://www.ncbi.nlm.nih.gov/>.
- 346 [22] Stothard P: The Sequence Manipulation Suite: JavaScript programs for analyzing and  
347 formatting protein and DNA sequences. *Biotechniques* 2000; **28**:1102-4.
- 348 [23] Kuo HC, Lin PY, Chung TC, *et al*: DBCAT: database of CpG islands and analytical tools for  
349 identifying comprehensive methylation profiles in cancer cells. *J Comput Biol.* 2011; **18**:1013-7.  
350 doi: 10.1089/cmb.2010.0038.
- 351 [24] Larsen F, Gundersen G, Lopez R, Prydz H: CpG islands as gene markers in the human  
352 genome. *Genomics.* 1992; **13**:1095-107.
- 353 [25] Li LC, Dahiya R: MethPrimer: designing primers for methylation PCRs. *Bioinformatics.* 2002;  
354 **18**:1427-31.
- 355 [26] Tusnády GE, Simon I, Váradi A, Arányi T: BiSearch: Primer-design and Search Tool for PCR  
356 on Bisulfite Treated Genomes. *Nucleic Acids Res* 2005; **33**:e9.
- 357 [27] Sun S, Li P: HMPL: a Pipeline for Identifying Hemimethylation Patterns by Comparing two  
358 samples. *Cancer Informatics* 2015; **14**:235–45. doi: 10.4137/CIN.S17286.



- 359 [28] Blast [Internet]. Bethesda (MD): National Library of Medicine (US), National Center for  
360 Biotechnology Information; 2004 – [cited 2017 Feb 11]. Available from:  
361 <https://blast.ncbi.nlm.nih.gov/Blast.cgi>.
- 362 [29] Lasken RS, Schuster DM, Rashtchian A: Archaeobacterial DNA polymerases tightly bind uracil-  
363 containing DNA. *J Biol Chem* 1996; **271**:17692-6.
- 364 [30] Hall TA: BioEdit: a user-friendly biological sequence alignment editor and analysis program  
365 for Windows 95/98/NT. *Nucl. Acids. Symp. Ser* 1999; **41**:95-8.
- 366 [31] Bock C, Reither S, Mikeska T, Paulsen M, Walter J, Lengauer T: BiQ Analyzer: visualization  
367 and quality control for DNA methylation data from bisulfite sequencing. *Bioinformatics* 2005; **21**:  
368 4067-8.
- 369 [32] PCR fidelity calculator (ThermoFisher Scientific). Available from:  
370 [https://www.thermofisher.com/us/en/home/brands/thermo-scientific/molecular-biology/molecular-](https://www.thermofisher.com/us/en/home/brands/thermo-scientific/molecular-biology/molecular-biology-learning-center/molecular-biology-resource-library/thermo-scientific-web-tools/pcr-fidelity-calculator.html)  
371 [biology-learning-center/molecular-biology-resource-library/thermo-scientific-web-tools/pcr-](https://www.thermofisher.com/us/en/home/brands/thermo-scientific/molecular-biology/molecular-biology-learning-center/molecular-biology-resource-library/thermo-scientific-web-tools/pcr-fidelity-calculator.html)  
372 [fidelity-calculator.html](https://www.thermofisher.com/us/en/home/brands/thermo-scientific/molecular-biology/molecular-biology-learning-center/molecular-biology-resource-library/thermo-scientific-web-tools/pcr-fidelity-calculator.html). Accessed 21 November, 2017.
- 373 [33] Boulougouris *et al*: personal communication (2017).

374 **FIGURES**

375 **Figure 1.** Agarose gels showing A) UBC integrity assay on genomic DNA before bisulfite  
376 conversion (Protocol, section 3; adapted from [17]), B) UBC bisulfite integrity assay on  
377 genomic DNA from (A) after bisulfite conversion (Protocol, section 5; adapted from [17]), C)  
378 eluted 4-amplicon mix amplified on genomic DNA from (B) before cloning (Protocol, section  
379 9; adapted from [33]), and D) colony PCR with pCRII primers on 5 clones containing  
380 amplicons from (C) (Protocol, section 9; adapted from [33]). M: 1 kb+ ladder (ThermoFisher  
381 Scientific), ND: native DNA, BD: bisulfite-converted DNA, E: eluted 4-amplicon mix, C1-4:  
382 clone with an insert, C5: clone without an insert, N: no template control.

383

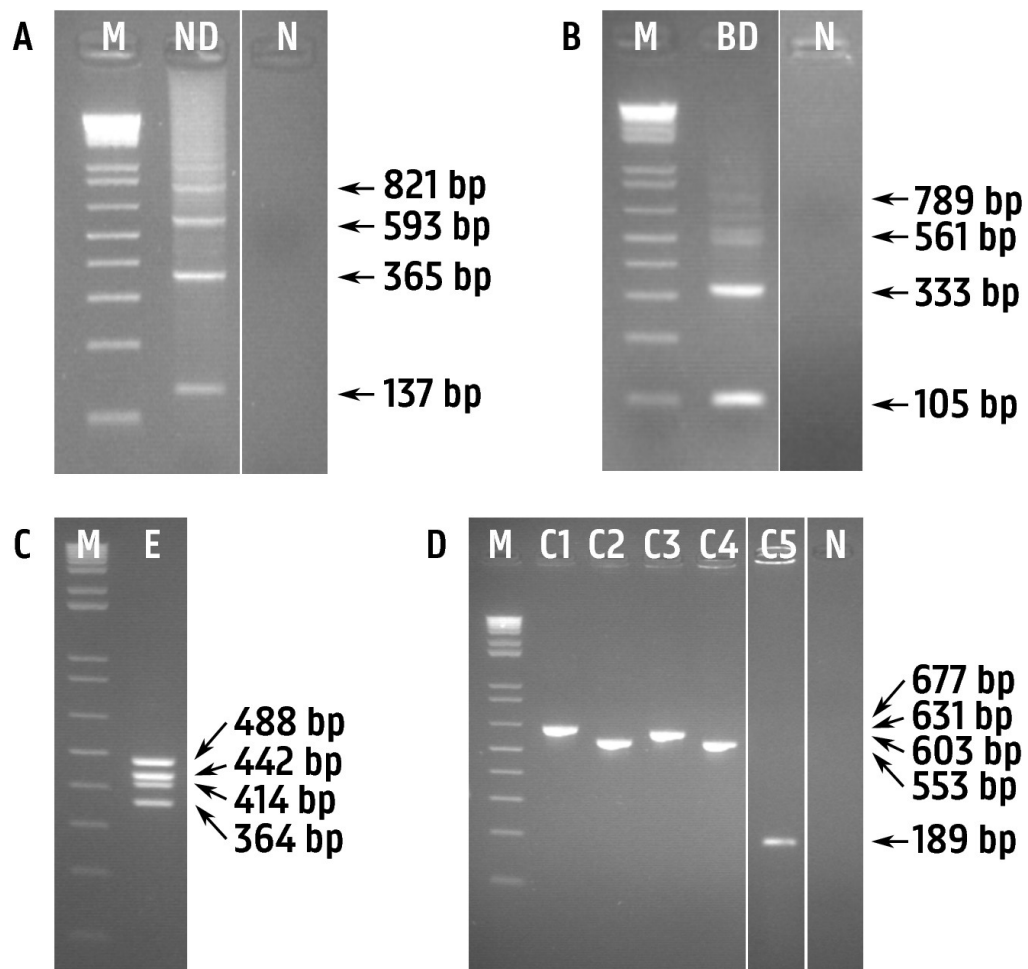

384 **TABLES**

385 **Table 1.** PCR details of the UBC (bisulfite) integrity [17] and pCRII assays.

| PCR mix (VWR) |                                                  | Cycling program |                     |       |
|---------------|--------------------------------------------------|-----------------|---------------------|-------|
| 5.7 µl        | H <sub>2</sub> O                                 | 14'30"          | 95°C                |       |
| 1.0 µl        | 10x Key Buffer                                   | 00'30"          | 95°C                | ]     |
| 1.0 µl        | 10 µM primers (5 µM each primer <sup>123</sup> ) | 00'30"          | Ta°C <sup>123</sup> | ] x40 |
| 0.2 µl        | 40 mM dNTPs (10 mM each nucleotide)              | 02'00"          | 72°C                | ]     |
| 0.1 µl        | 5 U/µl TEMPase Hot Start DNA Polymerase          | 05'00"          | 72°C                |       |
| 2.0 µl        | Template                                         | Hold            | 15°C                |       |
| 10.0 µl       | Total volume                                     |                 |                     |       |

386

387 <sup>1</sup> UBC integrity assay: amplicons of 137, 365, 593, 821,... bp (Ta = 68°C)

388 F: 5'-GCACCCTGTCHGACTACAACATCCAGAA-3'

389 R: 5'-ATGGTGTCRCTGGGCTCSACYTC-3'

390 <sup>2</sup> UBC bisulfite integrity assay: amplicons of 105, 333, 561, 789,... bp (Ta = 54°C)

391 F: 5'-GAARGAGTTTATTTTGTATTT-3'

392 R: 5'-TCACTAAACTCMACYTCC-3'

393 <sup>3</sup> pCRII assay: amplicons of insert length + 189 bp (Ta = 61°C)

394 F: 5'-AGCTATGACCATGATTACGCCAAG-3' (located 81 bp upstream TA cloning site)

395 R: 5'-AAACGACGGCCAGTGAATTGT-3' (located 108 bp downstream TA cloning site)

396 **Table 2.** Sanger sequencing details (BigDye Terminator v3.1 Cycle Sequencing Kit, Applied  
397 Biosystems)

| Sequencing mix |                                   | Cycling program |      |       |
|----------------|-----------------------------------|-----------------|------|-------|
| 3.0 $\mu$ l    | H <sub>2</sub> O                  | 2'00"           | 95°C |       |
| 0.5 $\mu$ l    | Ready Reaction mix                | 0'20"           | 95°C | ]     |
| 2.0 $\mu$ l    | 5x sequencing buffer <sup>1</sup> | 0'10"           | 60°C | ] x30 |
| 1.0 $\mu$ l    | GC-rich solution (Roche)          | 4'00"           | 65°C | ]     |
| 1.5 $\mu$ l    | Sequencing primer (2 $\mu$ M)     |                 |      |       |
| 2.0 $\mu$ l    | Template                          |                 |      |       |
| 10.0 $\mu$ l   | Total volume                      |                 |      |       |

<sup>1</sup> 200 mM Tris-HCl, pH 8 + 5 mM MgCl<sub>2</sub>
